# Supplementary material
Source: publisher figshare collection journal article supplement (https://acs.figshare.com/ndownloader/files/10855226)
Supplement: Supplementary file 1 [file 10855226]

# Supporting Information

## A Turn-on Fluorescent Probe for Detection of Sub-ppm level of a Sulfur Mustard Simulant with High Selectivity

Yuanlin Zhang<sup>a</sup>, Yanlin Lv<sup>a</sup>, Xuefei Wang<sup>a</sup>, Aidong Peng<sup>b</sup>, Kaiquan Zhang<sup>a</sup>, Xiaoke Jie<sup>a</sup>, Jijun Huang<sup>b,\*</sup> and Zhiyuan Tian<sup>a,\*</sup>

<sup>a</sup>School of Chemical Sciences, University of Chinese Academy of Sciences (UCAS), Beijing 100049, P. R. China.

<sup>b</sup>College of Materials Science and Opto-Electronic Technology, University of Chinese Academy of Sciences (UCAS), Beijing 100049, P. R. China.

\*E-mail: zytian@ucas.ac.cn, [jjh@ucas.ac.cn](mailto:jjh@ucas.ac.cn)

### Table of contents

**Table S1.** Summary of merits of representative fluorescent probes for sulfur mustard (simulant) sensing.

**Figure S1.** Fluorescence responses of DPXT (10  $\mu$ M) to 2-CEES (100 equiv.) recorded at 2 min interval and time-dependent fluorescence responses recorded at 593 nm.

**Figure S2.** Fluorescence intensity (at 593 nm) enhancement of DPXT in various solvents (10  $\mu$ M) upon addition of 100 equiv. of 2-CEES.

**Figure S3.** (a) Fluorescence emission spectra of DPXT/DCM solution upon gradually increasing the concentration 2-CEES (0-5 $\mu$ M). (b) A plot of the fluorescence intensity (at 593 nm) as a function of 2-CEES concentration. The red line is a linear fit to the experimental data ( $R^2 = 0.993$ ).

**Figure S4.** (a) Photographs of a TLC plate patterned with “CEES” using DPXT/DCM solution acquired before and after exposure to 2-CEES vapor with concentration of 0.5 ppm upon illumination of 365-nm light. (b) Fluorescence emission spectra of the abovementioned TLC plate before (black curve) and after (red curve) exposure to 2-CEES vapor ( $\lambda_{\text{ex}} = 570$  nm).

**Figure S5.** UV-vis absorption (a) and fluorescence emission spectra (b) of DPXT/DCM solution and the DCM solution containing the reference compound xanthene-9-thione (XTT), respectively, in the presence of 100 equiv. of 2-CEES.

**Figure S6.** Partial  $^1\text{H}$  NMR (400 MHz) characterization results of DPXT probe and the thiopyronin product in  $\text{CD}_2\text{Cl}_2$ .

**Figure S7.**  $^1\text{H}$  NMR characterization result of the DPXT probe ( $\text{CDCl}_3$ , 400 MHz)

**Figure S8.**  $^{13}\text{C}$  NMR characterization result of the DPXT probe ( $\text{CDCl}_3$ , 100 MHz)

**Figure S9.** MALDI-MS characterization result of the DPXT probe.

**Figure S10.**  $^1\text{H}$  NMR characterization result of thiopyronin derivative ( $\text{CDCl}_3$ , 400 MHz)

**Figure S11.**  $^{13}\text{C}$  NMR characterization result of thiopyronin derivative ( $\text{DMSO}-d_6$ , 150 MHz)

**Figure S12.** MALDI-MS characterization result of thiopyronin derivative.

**Figure S13.**  $^1\text{H}$  NMR characterization result of XTT ( $\text{CDCl}_3$ , 400 MHz)

**Figure S14.**  $^{13}\text{C}$  NMR characterization result of XTT ( $\text{CDCl}_3$ , 100 MHz)

**Figure S15.** MALDI-MS characterization result of XTT

**Table S1.** Summary of merits of representative fluorescent probes for sulfur mustard (simultant) sensing.

| Probe structure                                                                     | Response time (2-CEES)                                 | Signal enhancement        | Limit of detection (LOD)                                          | Test condition                      | Gas detection | Ref.         |
|-------------------------------------------------------------------------------------|--------------------------------------------------------|---------------------------|-------------------------------------------------------------------|-------------------------------------|---------------|--------------|
| 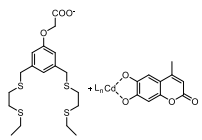   | 1 min<br>(2-CEES)                                      | ~ 4 fold                  | 200 $\mu$ M<br>(2-CEES)                                           | 80°C, pH=9                          | No            | <sup>1</sup> |
|    | 1 min<br>(2-CEES)                                      | ~ 27 fold                 | 10 $\mu$ M<br>(2-CEES)                                            | 80°C+K <sub>2</sub> CO <sub>3</sub> | Yes           | <sup>2</sup> |
|   | 1 min<br>(2-CEES)                                      | ~ 6 fold                  | 18 $\mu$ M<br>(SM)                                                | 80°C+K <sub>2</sub> CO <sub>3</sub> | Yes           | <sup>3</sup> |
|  | >1 h (SM in solution),<br>10 min<br>(gaseous SM)       | ~ 100 fold                | 4.75 $\mu$ M (SM in solution),<br>6.25 ppm /10 min<br>(SM gas)    | room temperature                    | Yes           | <sup>4</sup> |
|  | 1 min (SM in solution)                                 | ~ 25 fold                 | 31.6 $\mu$ M (0.005 mg/mL) (SM in solution)                       | 50-60°C ,<br>KOH, MeOH              | No            | <sup>5</sup> |
|  | > 1 h (2-CEES in solution),<br>2 min<br>(2-CEES vapor) | 850 fold<br>(in solution) | 1.2 $\mu$ M (2-CEES in solution),<br>0.5 ppm/ min<br>(2-CEES gas) | room temperature                    | Yes           | This work    |

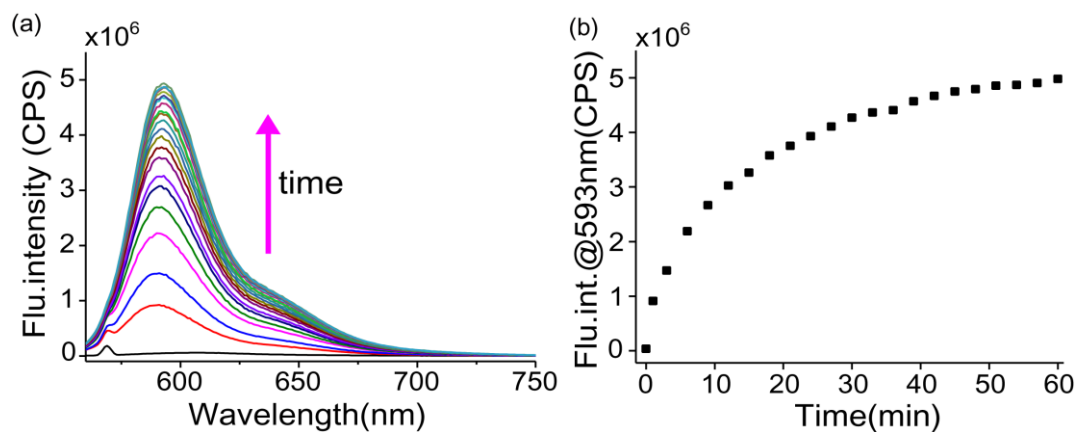

**Figure S1.** (a) Fluorescence responses of DPXT (10  $\mu$ M) to 2-CEES (100 equiv.) recorded at 2 min interval; (b) time-dependent fluorescence responses recorded at 593 nm.  $\lambda_{\text{ex}} = 465$  nm

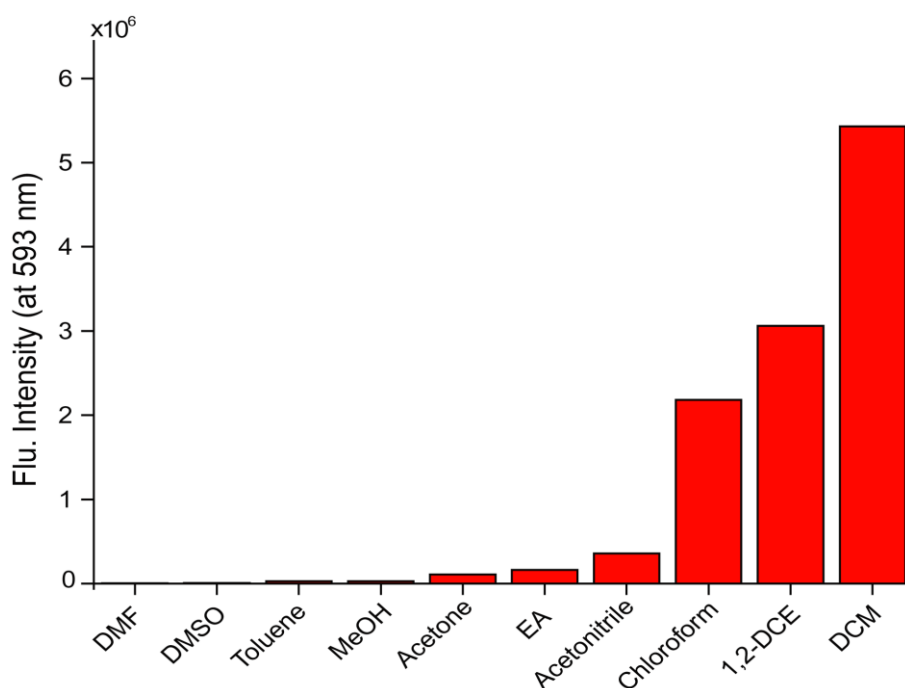

**Figure S2.** Fluorescence intensity (at 593 nm) enhancement of DPXT in various solvents (10  $\mu$ M) upon addition of 100 equiv. of 2-CEES.  $\lambda_{\text{ex}} = 570$  nm. Each spectrum was recorded 1 h after the addition of 2-CEES.

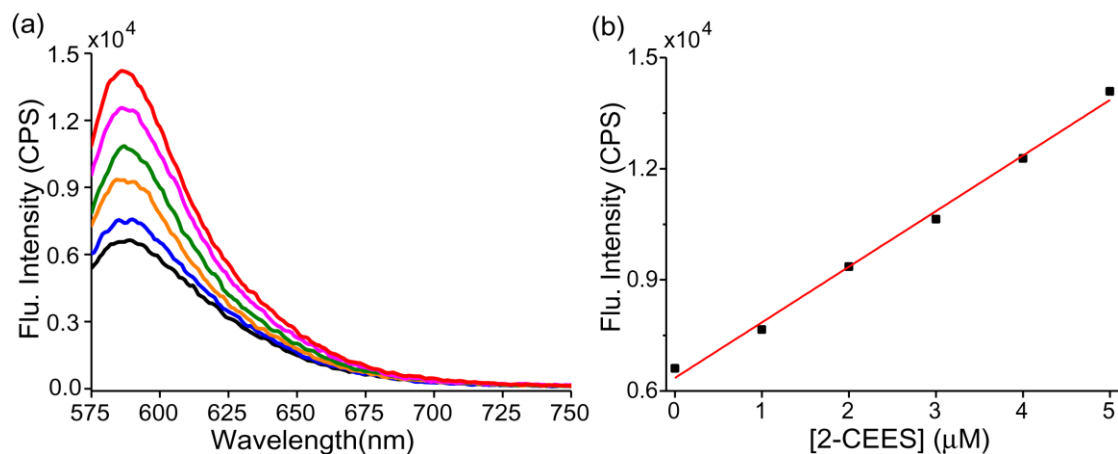

**Figure S3.** (a) Fluorescence emission spectra of DPXT/DCM solution upon gradually increasing the concentration 2-CEES (0-5  $\mu\text{M}$ ). (b) A plot of the fluorescence intensity (at 593 nm) as a function of 2-CEES concentration. The red line is a linear fit to the experimental data ( $R^2 = 0.993$ ).

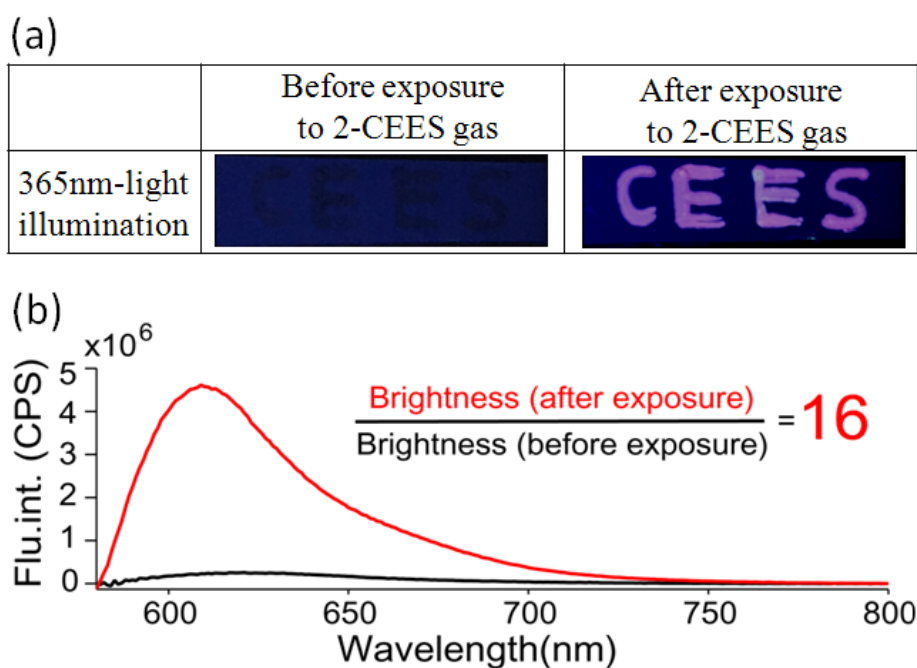

**Figure S4.** (a) Photographs of a TLC plate patterned with “CEES” using DPXT/DCM solution acquired before and after exposure to 2-CEES vapor with concentration of 0.5 ppm upon illumination of 365-nm light. (b) Fluorescence emission spectra of the abovementioned TLC plate before (black curve) and after (red curve) exposure to 2-CEES vapor ( $\lambda_{\text{ex}} = 570 \text{ nm}$ ).

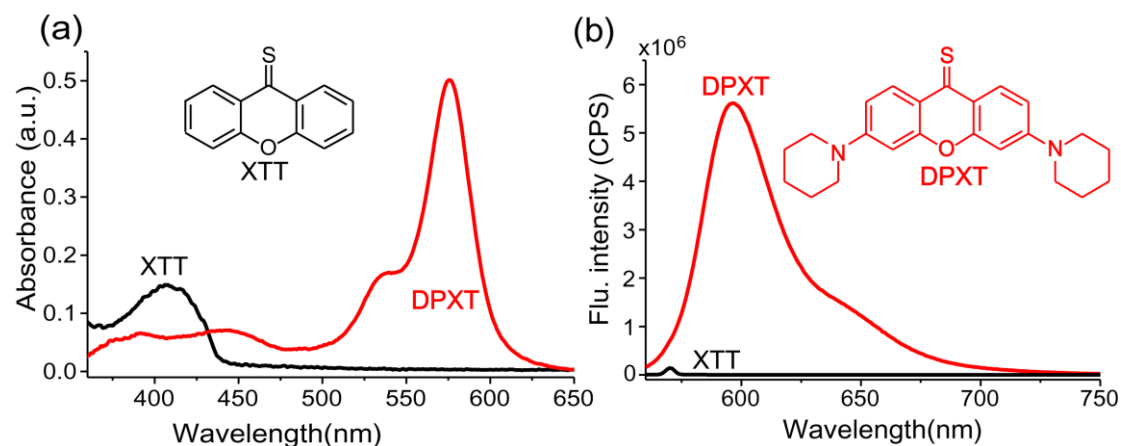

**Figure S5.** UV-vis absorption (a) and fluorescence emission spectra (b) of DPXT/DCM solution and the DCM solution containing the reference compound xanthene-9-thione (XTT), respectively, in the presence of 100 equiv. of 2-CEES.

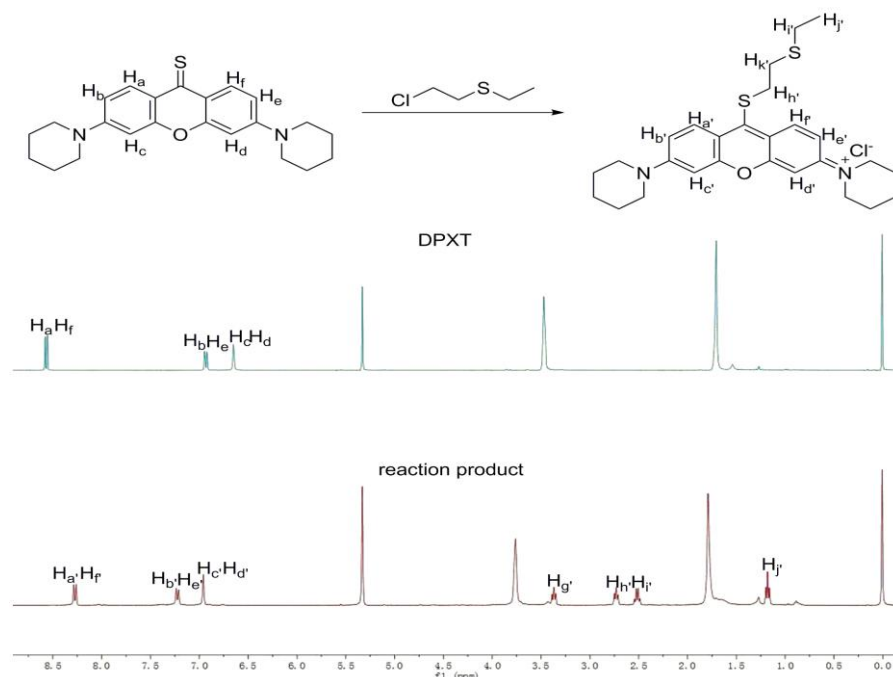

**Figure S6.** Partial  $^1\text{H}$  NMR (400 MHz) characterization results of DPXT probe and the thiopyronin product in  $\text{CD}_2\text{Cl}_2$

To gain a deeper insight into the underlying mechanism that DPXT underwent, the comparative analysis of the  $^1\text{H}$  NMR measurement results of DPXT and the reaction product confirmed the molecular structure of the latter and presented a clue to the underlying mechanism that DPXT underwent. In the presence of CEES, the new signals at 3.37 ( $\text{H}_{\text{g}'}$ ), 2.73( $\text{H}_{\text{h}'}$ ), 2.52( $\text{H}_{\text{i}'}$ ), 1.18( $\text{H}_{\text{j}'}$ ) ppm in the  $^1\text{H}$  NMR spectrum

attributable to reaction between DPXT and CEES. Hydrogen signals  $H_a$ ,  $H_f$  (8.55 ppm) shifted to  $H_a'$ ,  $H_f'$  (8.29 ppm) due to the shielding effect, it attribute to the disappearance of the electron-withdrawing thiocarbonyl groups after the reaction of DPXT with CEES. Due to the de-shielding effect of the nitrogen ionization in the piperidyl group, hydrogen signals  $H_b$ ,  $H_e$  (6.95 ppm) and  $H_b'$ ,  $H_e'$  (6.65 ppm) which are adjacent to piperidyl group shift to the low field  $H_b'$ ,  $H_e'$  (7.24 ppm) and  $H_b''$ ,  $H_e''$  (6.96 ppm). At the same time, the hydrogen signals in the piperidyl group carbon also moves to the low field significantly. In addition, the proposed mechanism of DPXT probe for 2-CEES sensing also found support from the MALDI-MS characterization results of the DPXT probe sample in the absence and presence of 2-CEES. Specifically, the adduct product of the probe upon addition of 2-CEES displayed characteristic mass-to-charge ratios at 467.2186 (MALDI-MS,  $[M]^+$ ), which is in well agreement with the calculated  $m/z$  values of the structures of reaction product. Definitely, the  $^1H$  NMR and MALDI-MS characterization results validated the abovementioned proposed sensing mechanism of the as-prepared DPXT probe.

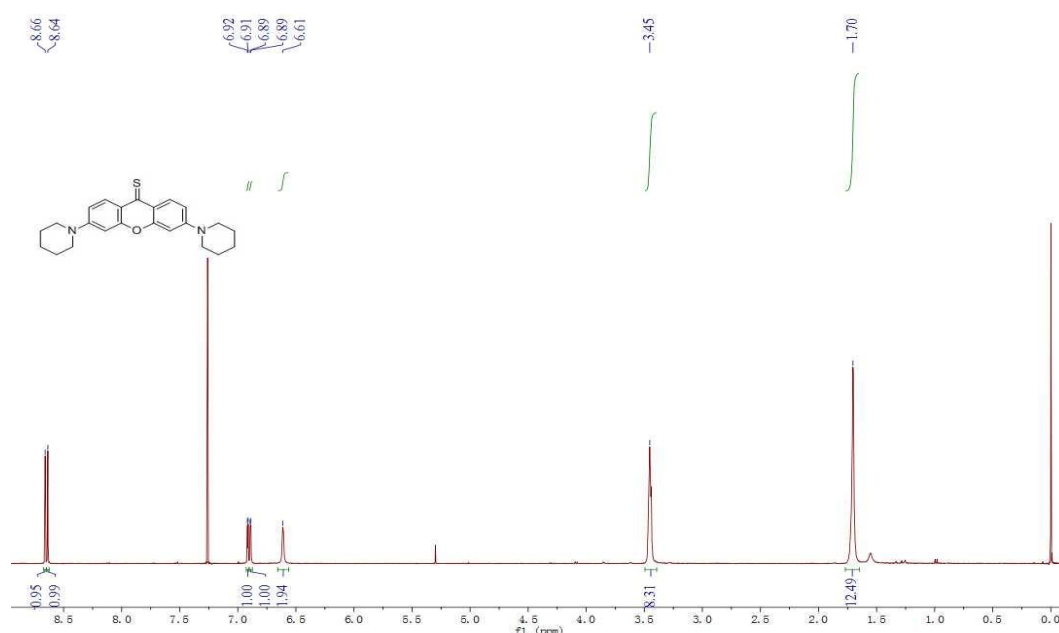

**Figure S7.**  $^1H$  NMR characterization result of the DPXT probe ( $CDCl_3$ , 400 MHz)

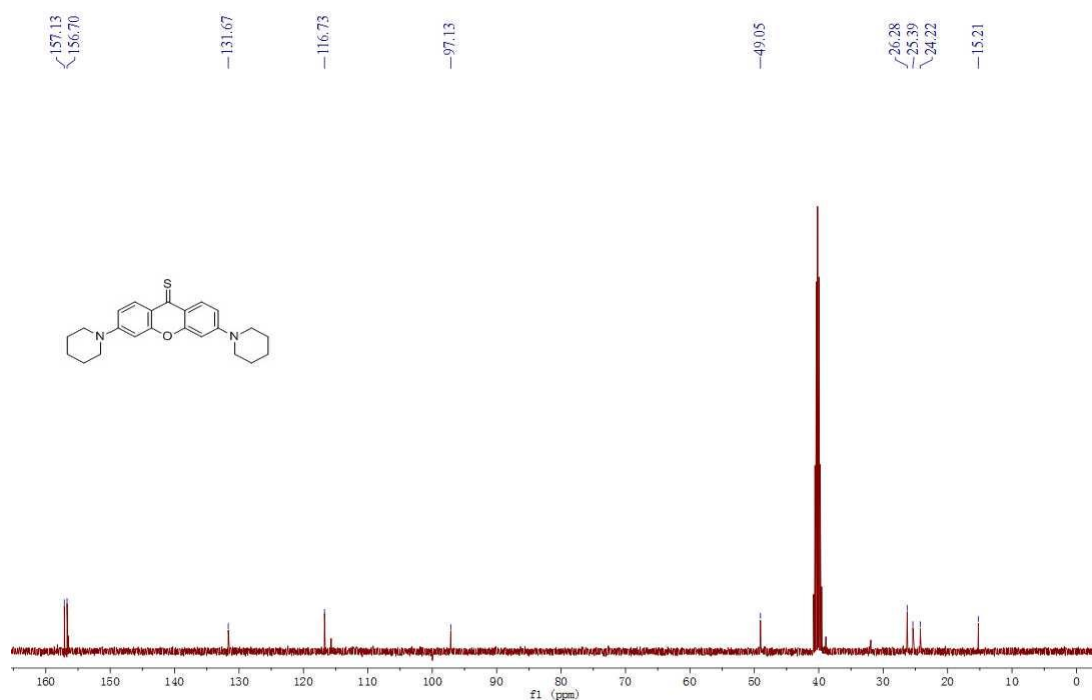

**Figure S8.** <sup>13</sup>C NMR characterization result of the DPXT probe (CDCl<sub>3</sub>, 100 MHz)

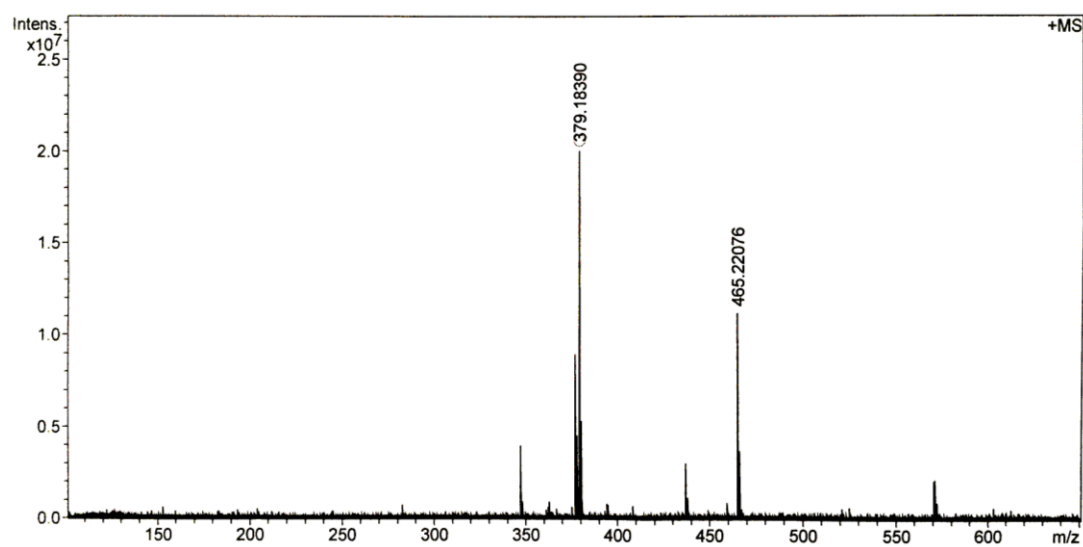

**Figure S9.** MALDI-MS characterization result of the DPXT probe.



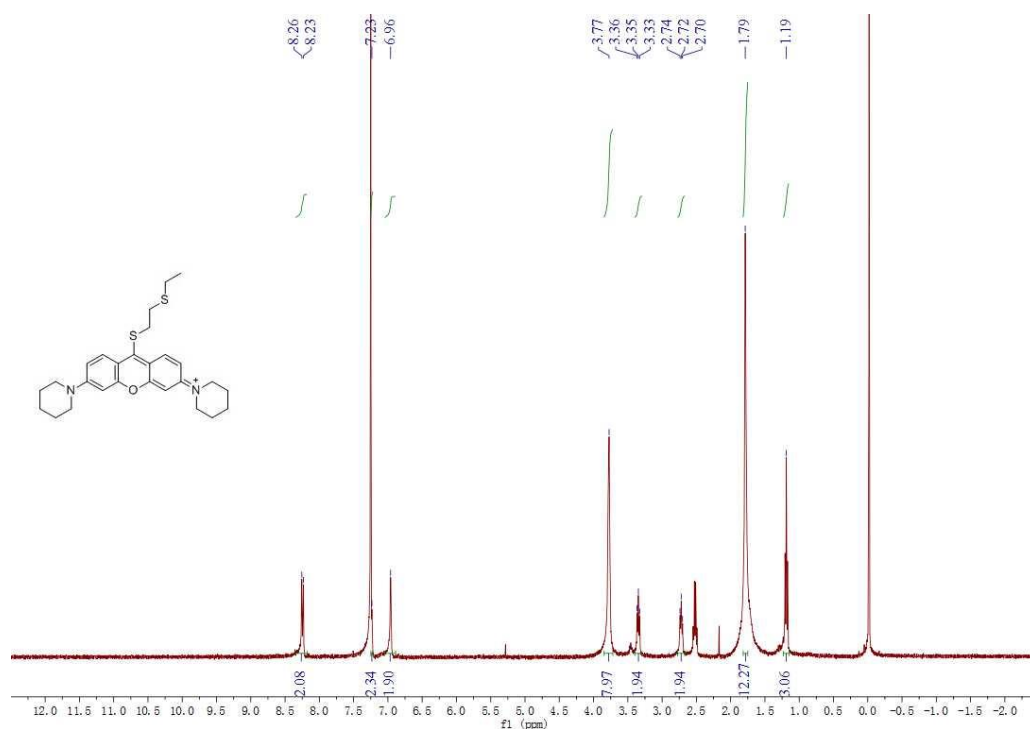

**Figure S10.**  $^1\text{H}$  NMR characterization result of thiopyronin derivative ( $\text{CDCl}_3$ , 400 MHz)

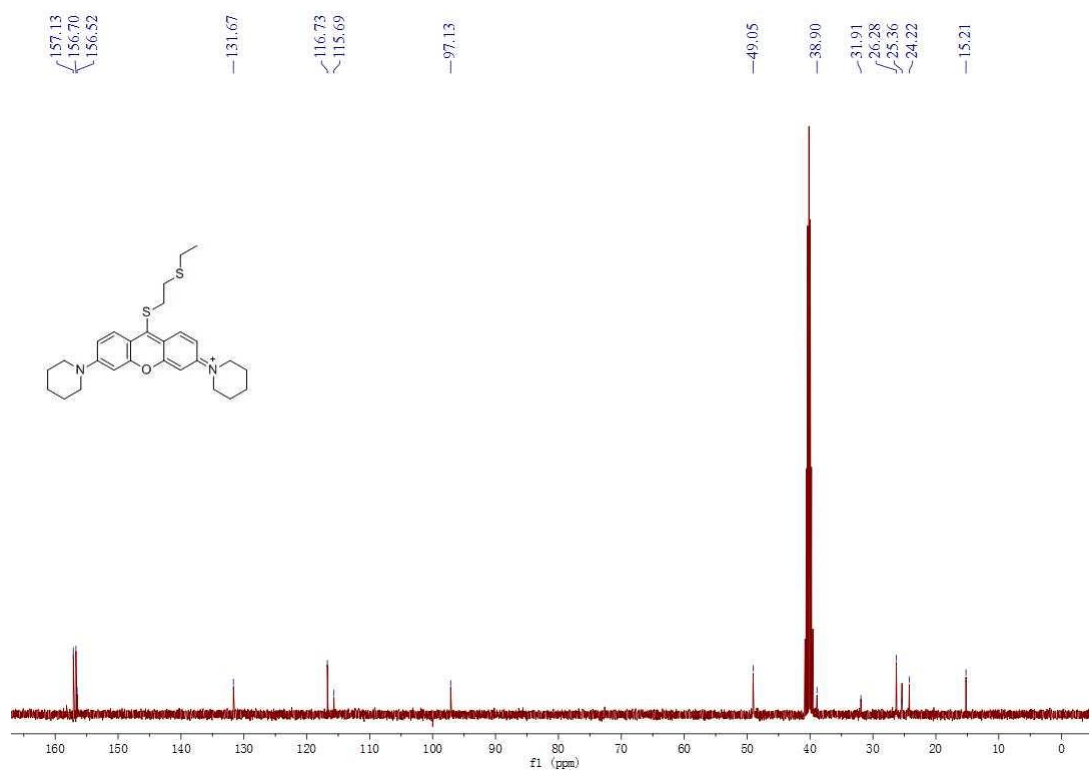

**Figure S11.**  $^{13}\text{C}$  NMR characterization result of thiopyronin derivative ( $\text{DMSO}-d_6$ , 150 MHz)

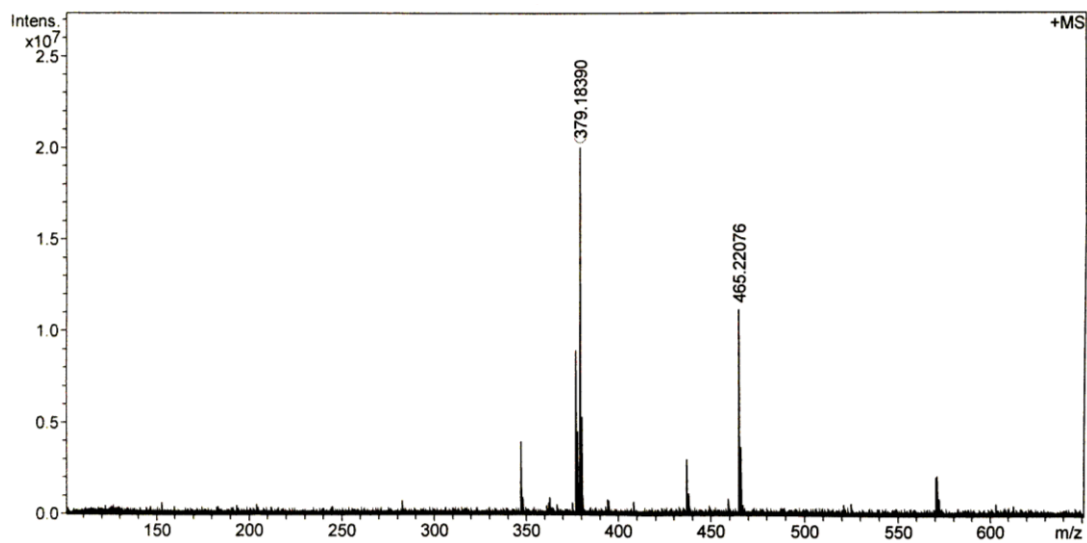

**Figure S12.** MALDI-MS characterization result of thiopyronin derivative.

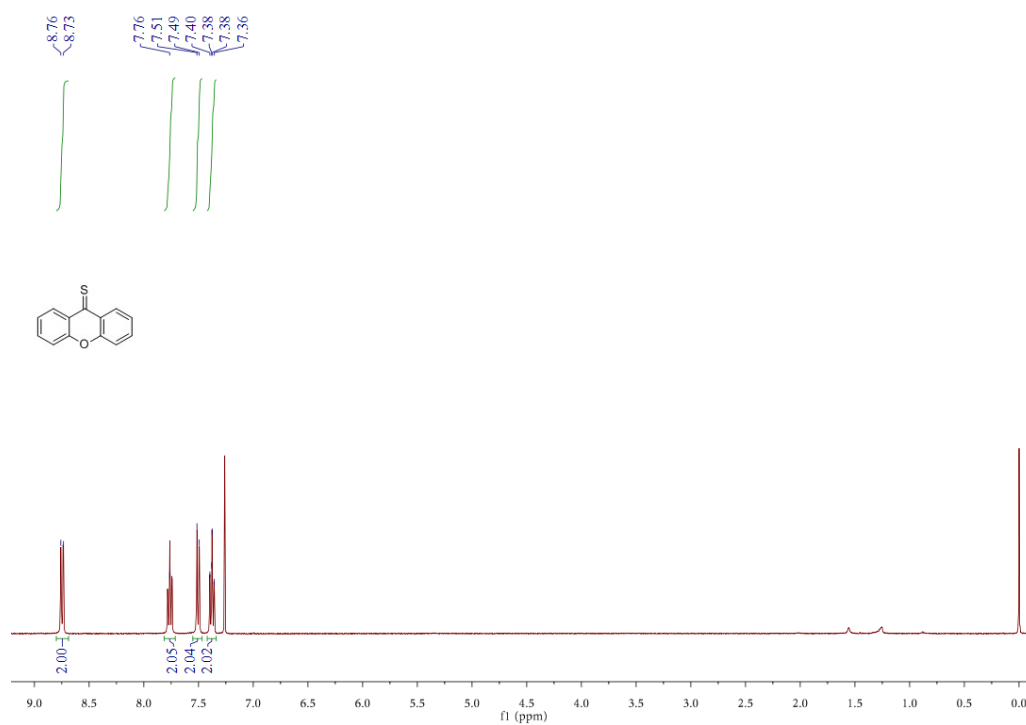

**Figure S13.** <sup>1</sup>H NMR characterization result of XTT (CDCl<sub>3</sub>, 400 MHz).

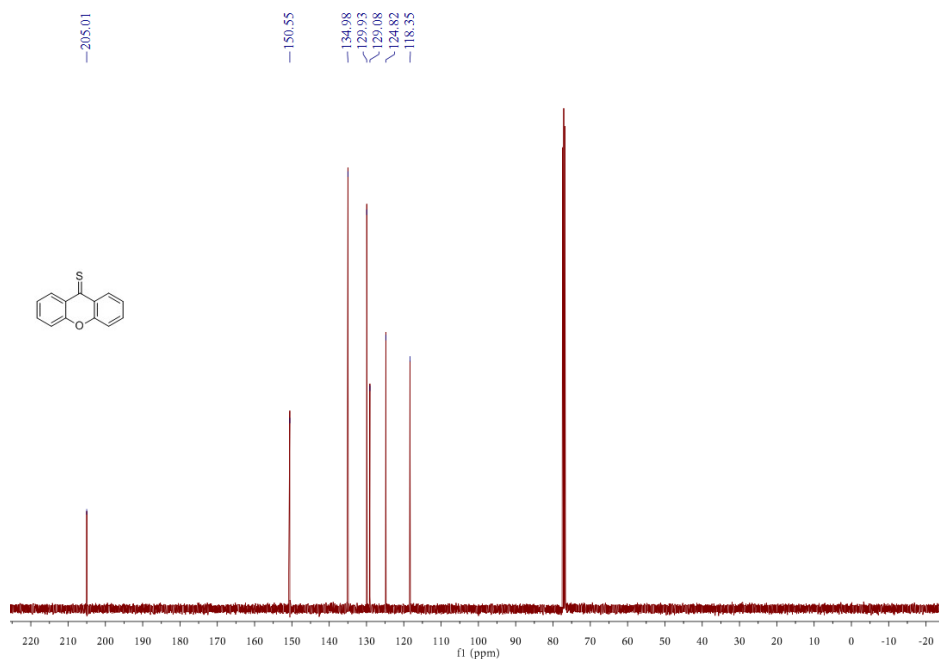

**Figure S14.** <sup>13</sup>C NMR characterization result of XTT (CDCl<sub>3</sub>, 400 MHz).

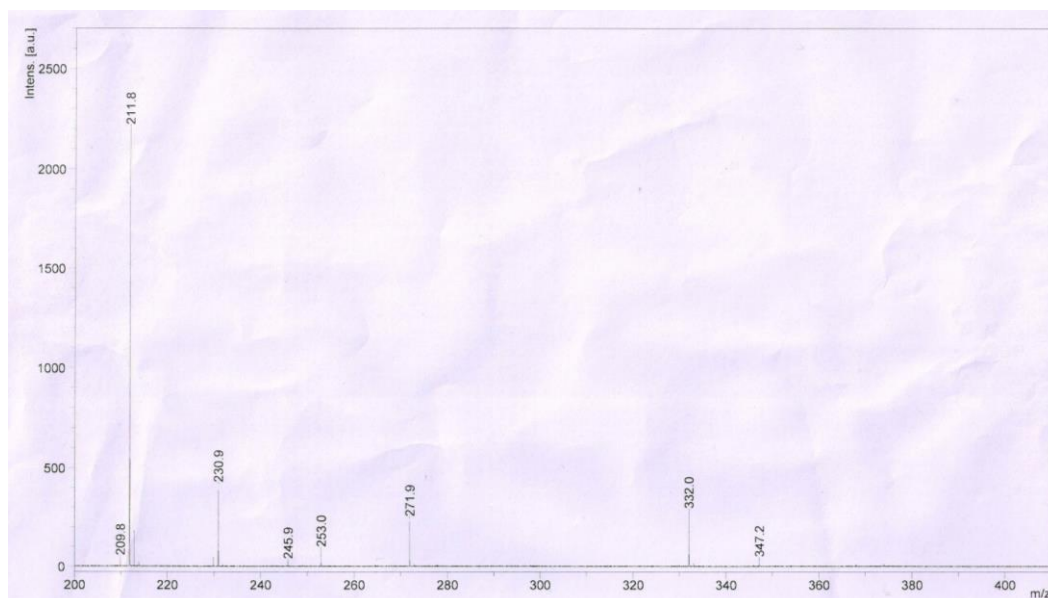

**Figure S15.** MALDI-MS characterization result of XTT.

## References

- (1) Kumar, V.; Anslyn, E. V. *J. Am. Chem. Soc.* **2013**, *135*, 6338-6344.
- (2) Kumar, V.; Anslyn, E. V. *Chem. Sci.* **2013**, *4*, 4292-4297.
- (3) Kumar, V.; Rana, H. *RSC Adv.* **2015**, *5*, 91946-91950.
- (4) Goud, D. R.; Purohit, A. K.; Tak, V.; Dubey, D. K.; Kumar, P.; Pardasani, D. *Chem. Commun.* **2014**, *50*, 12363-12366.
- (5) Kumar, V.; Rana, H.; Raviraju, G.; Gupta, A. K. *Anal. Chem.* **2018**, *90*, 1417-1422.
